# Supplementary material
Source: HighWire-hosted journal article supplement (http://molpharm.aspetjournals.org/highwire/filestream/76883/field_highwire_adjunct_files/1/Sergei_Suppl_Fig_1.pdf)
Supplement: Sergei_Suppl_Fig_1.pdf [file Sergei_Suppl_Fig_1.pdf]

**Iron Chelators of the DpT and BpT Series Inhibit HIV-1 Transcription: Identification of Novel Cellular Targets – Iron, CDK2 and CDK9. Debebe, Z., Ammosova, T., Breuer, D., Lovejoy, D.B., Kalinowski, D.S., Karla, P.K., Kumar, K, Jerebtsova, M., Ray, P., Kashanchi, F. Gordeuk, V.R., Richardson, D.R. and Nekhai, S. *Molecular Pharmacology***

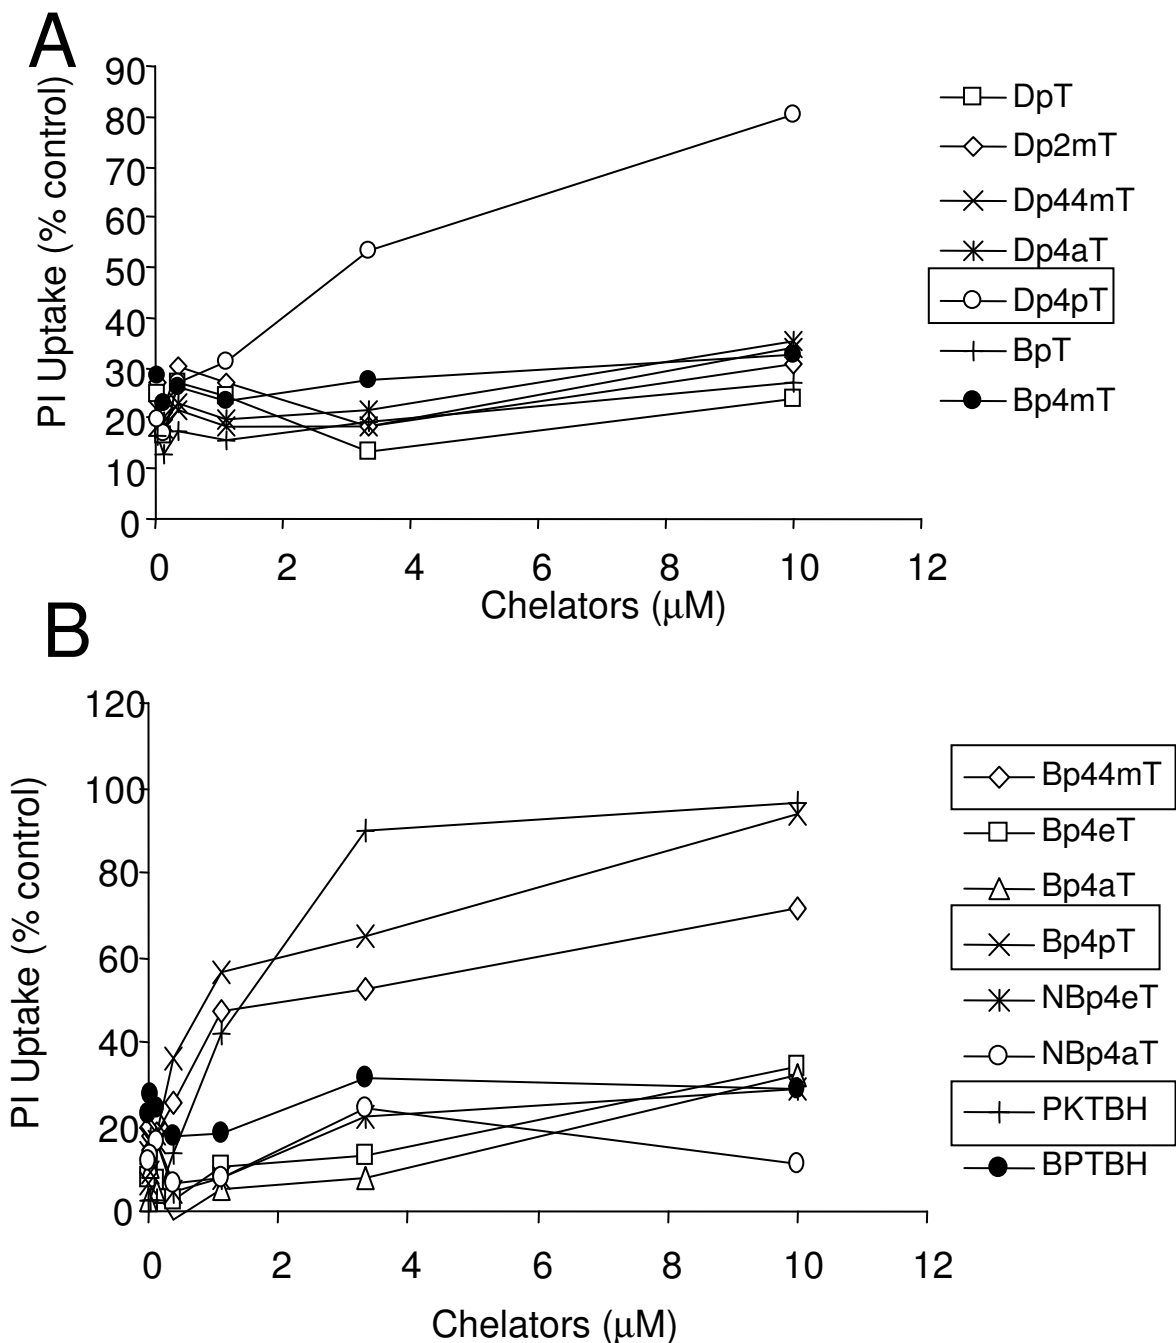

**Supplemental Figure 1. Toxicity of iron chelators in CEM-GFP cells.** CEM-GFP cells were infected with Adeno-Tat and then incubated with indicated concentrations of the iron chelators for 24 h at 37°C. The cells were supplemented with propidium iodide (PI) and its fluorescence was measured. Figure 1A and 1B show different iron chelators and have been separated for clarity. The most cytotoxic chelators leading to marked PI uptake (*i.e.*, Dp4pT, Bp44mT, Bp4mT and PKTBH) are indicated in boxes. Results are means of 3 independent experiments.
